# Supplementary material
Source: PubMed Central journal article supplement (PMC2518239)
Supplement: tpc.107.057612_1.pdf [file tpc.107.057612_1.pdf]

Supplemental Data. Kushwaha et al (2008). Calmodulin7 Plays an Important Role as Transcriptional Regulator in *Arabidopsis* Seedling Development

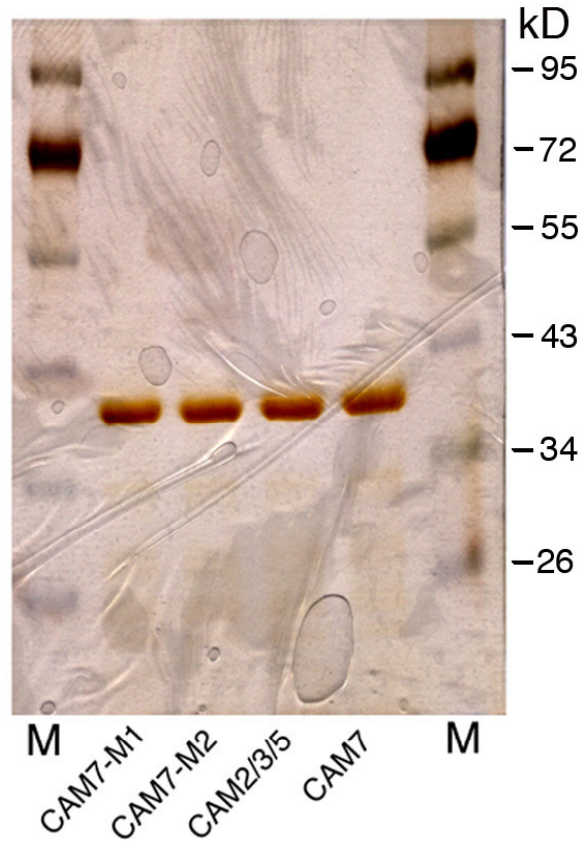

**Supplemental Figure 1: Comparison of Quality of Various Purified Proteins Used for EMSAs.** SDS-PAGE (silver stain) containing about 1  $\mu\text{g}$  of various GST tagged purified proteins used for EMSA. M stands for molecular weight markers.

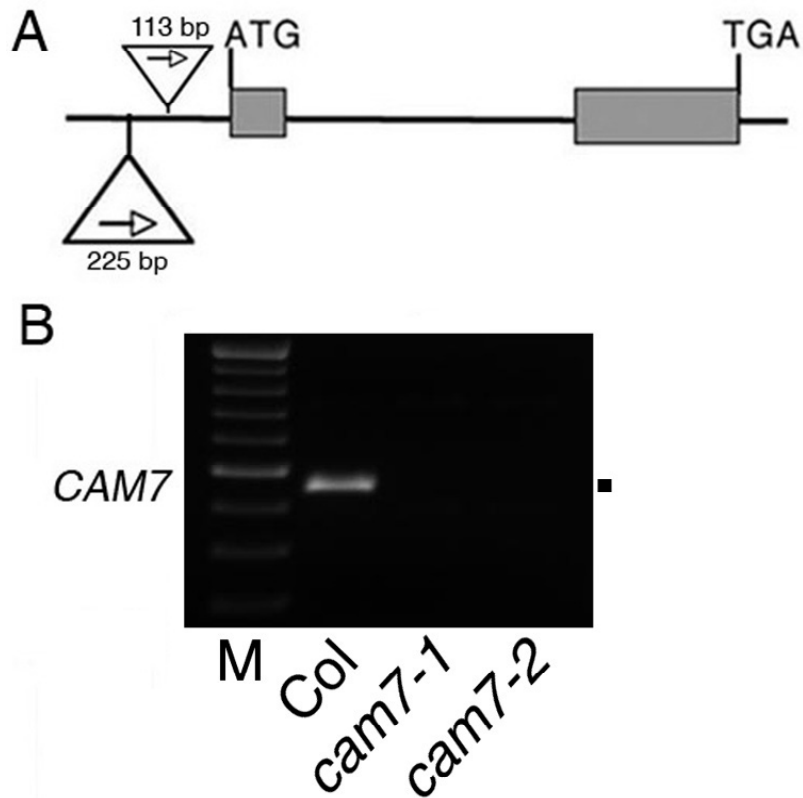

**Supplemental Figure 2: Identification of *cam7* Mutants.** **A**, schematic diagram shows the T-DNA insertion sites (225 (*cam7-1*) and 113 (*cam7-2*) base pair upstream to ATG codon) in *CAM7*. The inverted triangles show the T-DNA insertion sites. The exons are shown as filled boxes between the start (ATG) and stop (TGA) codons. **B**, Reverse transcriptase PCR (RT-PCR) of *CAM7* in wild type (Col) or *cam7* mutants using primers designed from the start codon of *CAM7* to 3' UTR region. M indicates molecular weight markers and the dots show a DNA fragment of 500 base pair.

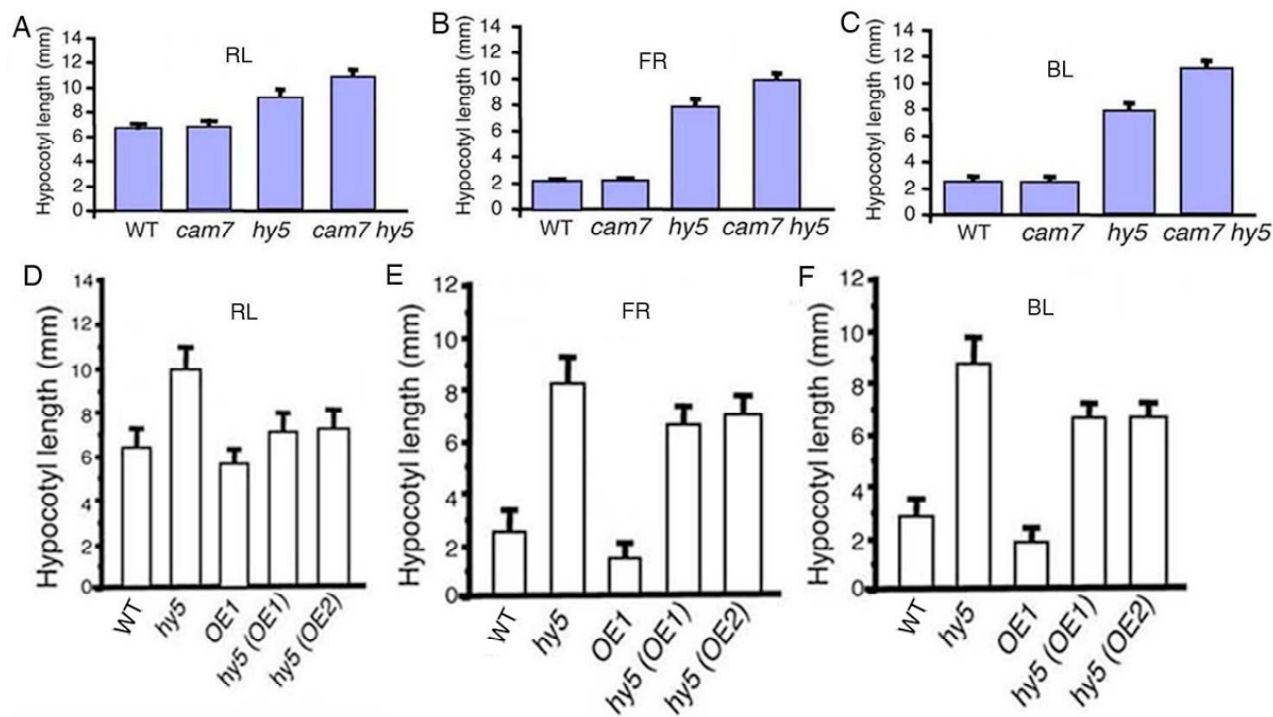

**Supplemental Figure 3. CAM7 and HY5 Promote Photomorphogenic Growth at Various Wavelengths of Light.** A to F, Quantification of hypocotyl length of 6-day-old seedlings grown in red (RL: 60  $\mu\text{mol}/\text{m}^2/\text{s}$ ), far-red (FR: 40  $\mu\text{mol}/\text{m}^2/\text{s}$ ) or blue light (BL: 20  $\mu\text{mol}/\text{m}^2/\text{s}$ ). About 25-30 seedlings were used for the measurement of hypocotyls length. The error bars indicate standard deviations.
